# Supplementary material for: A Population Classification Evolution Algorithm for the Parameter Extraction of Solar Cell Models
Source: Hindawi journal article supplement (doi:10.1155/2016/2174573), 2016-01-01
Supplement: f1 [file 2174573.f1.zip]

Archive with 16 entries (14 files):
- SupplementalFiles/
- SupplementalFiles/PCE_Code_Matlab/
- SupplementalFiles/PCE_Code_Matlab/all.mat
- SupplementalFiles/PCE_Code_Matlab/curr.mat
- SupplementalFiles/PCE_Code_Matlab/currFil.xls
- SupplementalFiles/PCE_Code_Matlab/error_calc.m
- SupplementalFiles/PCE_Code_Matlab/Get_Functions_details.m
- SupplementalFiles/PCE_Code_Matlab/INITIALIZE_sol_and_gBest.m
- SupplementalFiles/PCE_Code_Matlab/pce.m
- SupplementalFiles/PCE_Code_Matlab/PCE_Evaluate.m
- SupplementalFiles/PCE_Code_Matlab/pce_main.m
- SupplementalFiles/PCE_Code_Matlab/plotIV.m
- SupplementalFiles/PCE_Code_Matlab/simplebounds.m
- SupplementalFiles/PCE_Code_Matlab/volt.mat
- SupplementalFiles/PCE_Code_Matlab/volt.xls
- SupplementalFiles/PCE_Code_Matlab/xUPDATE.m
