# Supplementary material for: A Population Classification Evolution Algorithm for the Parameter Extraction of Solar Cell Models
Source: Hindawi journal article supplement (doi:10.1155/2016/2174573), 2016-01-01
Supplement: f1 [file 2174573.f1.zip › SupplementalFiles/PCE_Code_Matlab/currFil.xls]

## Sheet: Data
0.764
0.762
0.7605
0.7605
0.76
0.759
0.757
0.757
0.7555
0.754
0.7505
0.7465
0.7385
0.728
0.7065
0.6755
0.632
0.573
0.499
0.413
0.3165
0.212
0.1035
-0.01
-0.123
-0.21
