# Supplementary material for: A Population Classification Evolution Algorithm for the Parameter Extraction of Solar Cell Models
Source: Hindawi journal article supplement (doi:10.1155/2016/2174573), 2016-01-01
Supplement: f1 [file 2174573.f1.zip › SupplementalFiles/PCE_Code_Matlab/error_calc.m]

function [flag, err_result] = error_calc(fnum, fmin)

VTR = 10e-8;
flag = 0;
err_result = 0;

switch fnum

    case 1
        if(abs(fmin)<VTR)
            flag = 1;
            err_result = fmin;
        end; 
    case 2
        if(abs(fmin)<VTR)
            flag = 1;
            err_result = fmin;
        end; 
        
    case 3
        if(abs(fmin)<VTR)
            flag = 1;
            err_result = fmin;
        end; 
        
    case 4
        if(abs(fmin)<VTR)
            flag = 1;
            err_result = fmin;
        end; 
        
    case 5
        if(abs(fmin)<VTR)
            flag = 1;
            err_result = fmin;
        end; 
        
    case 6
        if(abs(fmin)<VTR)
            flag = 1;
            err_result = fmin;
        end; 
        
    case 7
        if(abs(fmin)<VTR)
            flag = 1;
            err_result = fmin;
        end; 
        
    case 8
        if(abs(fmin)-(-12569.487)<VTR)
            flag = 1;
            err_result = fmin-(-12569.487);
        end; 
        
    case 9
        if(abs(fmin)<VTR)
            flag = 1;
            err_result = fmin;
        end; 
        
    case 10
        if(abs(fmin)<VTR)
            flag = 1;
            err_result = fmin;
        end; 
        
    case 11
        if(abs(fmin)<VTR)
            flag = 1;
            err_result = fmin;
        end; 
        
    case 12
        if(abs(fmin)<VTR)
            flag = 1;
            err_result = fmin;
        end; 
        
    case 13
        if(abs(fmin)<VTR)
            flag = 1;
            err_result = fmin;
        end; 
        
    case 30
        if(abs(fmin)<0.002)
            flag = 1;
            err_result = fmin;
        end; 
    
    case 31
        if(abs(fmin)<0.002)
            flag = 1;
            err_result = fmin;
        end; 
            
end
