# Supplementary material for: A Population Classification Evolution Algorithm for the Parameter Extraction of Solar Cell Models
Source: Hindawi journal article supplement (doi:10.1155/2016/2174573), 2016-01-01
Supplement: f1 [file 2174573.f1.zip › SupplementalFiles/PCE_Code_Matlab/pce.m]

function pce(Nsol, Nvar, UB_LB, UB, LB, Fun)


for sol = 1:Nsol

    xUPDATE(Nsol, Nvar, UB_LB, UB, LB, sol, Fun)

end
