# Supplementary material for: A Population Classification Evolution Algorithm for the Parameter Extraction of Solar Cell Models
Source: Hindawi journal article supplement (doi:10.1155/2016/2174573), 2016-01-01
Supplement: f1 [file 2174573.f1.zip › SupplementalFiles/PCE_Code_Matlab/volt.xls]

## Sheet: Data
-0.2057
-0.1291
-0.0588
0.0057
0.0646
0.1185
0.1678
0.2132
0.2545
0.2924
0.3269
0.3585
0.3873
0.4137
0.4373
0.459
0.4784
0.496
0.5119
0.5265
0.5398
0.5521
0.5633
0.5736
0.5833
0.59
